# Supplementary material for: Study of DNA adsorption on mica surfaces using a surface force apparatus
Source: PubMed Central journal article supplement (PMC4326959; doi:10.1038/srep08442), 2015-02-13
Supplement: srep08442-s1.pdf [file srep08442-s1.pdf]

## Study of DNA adsorption on mica surfaces using a surface force apparatus

Yajing Kan, Qiyan Tan, Gensheng Wu, Wei Si, Yunfei Chen\*

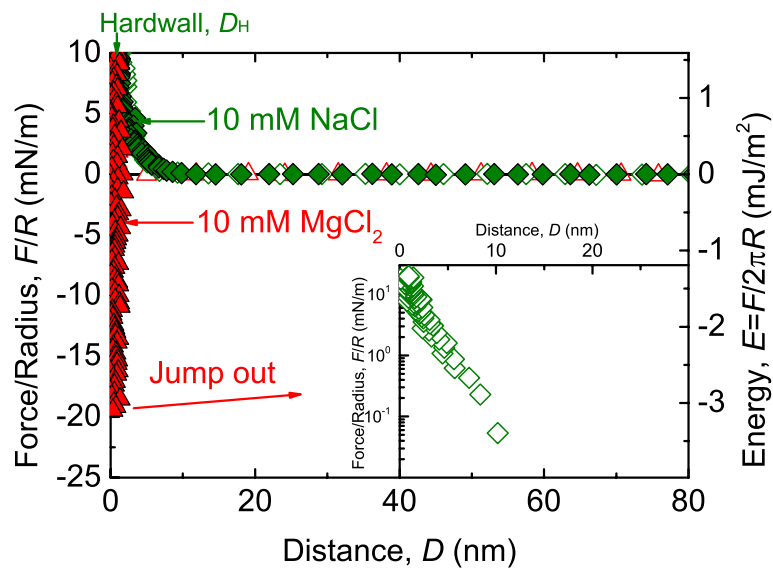

Figure S1. Force-distance profiles between DNA layer and mica when DNA was initially incubated on mica in the buffer solution containing 10 mM of NaCl. After DNA adsorption ( $\blacklozenge$ ), the buffer solution was replaced by 10 mM  $\text{MgCl}_2$  ( $\blacktriangle$ ). Inset shows the semi-log plot of the in-run data in 10 mM NaCl.

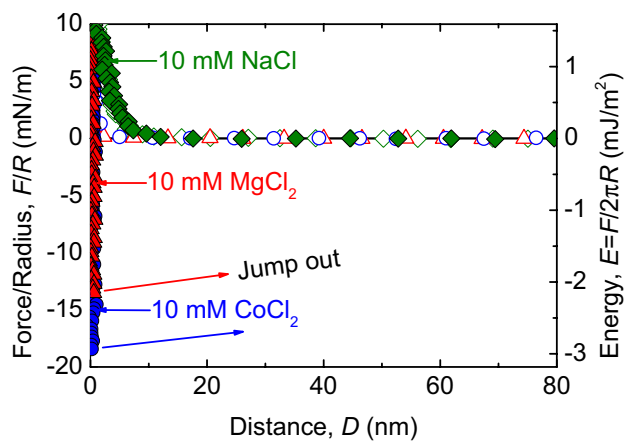

Figure S2. Force-distance profiles between two bare mica surfaces in 10 mM of NaCl ( $\blacklozenge$ ),  $\text{MgCl}_2$  ( $\blacktriangle$ ) and  $\text{CoCl}_2$  ( $\bullet$ ), respectively.
